# Supplementary material
Source: PubMed Central journal article supplement (PMC2874584)

**Supplementary Table I.** Antibodies used in flow cytometry.

| <b>Antigen-Fluorochrome</b> | <b>Manufacturer</b> | <b>Clone</b>    | <b>Isotype</b> | <b>Dilution</b> |
|-----------------------------|---------------------|-----------------|----------------|-----------------|
| CD3-Pacific Blue            | eBioscience         | OKT3            | IgG2a          | 1:40            |
| CD4-PE-Cy7                  | eBioscience         | RPA-T4          | IgG1           | 1:200           |
| CD8-PerCP-Cy5.5             | BD Pharmingen       | SK1             | IgG1           | 1:200           |
| IL-17 Alexa 488             | eBioscience         | eBio64<br>DEC17 | IgG1           | 1:20            |
| IL-4-PE                     | BD Pharmingen       | 3010.211        | IgG1           | 1:20            |
| IL-22-APC                   | R&D                 | 142928          | IgG1           | 1:20            |
| IFN $\gamma$ -Alexa 700     | BD Pharmingen       | B27             | IgG1           | 1:500           |

19 **Supplementary Figure 1. Similar composition of cells isolated from atopic**  
20 **dermatitis and psoriasis lesions.** Percentages of isolated T cells, CD4<sup>+</sup> T  
21 helper cells and CD8<sup>+</sup> T cytotoxic cells are statistically similar between atopic  
22 dermatitis and psoriasis skin lesions.

23

ACCEPTED MANUSCRIPT

# Supplementary Figure 1

## Composition of cells isolated from skin lesions

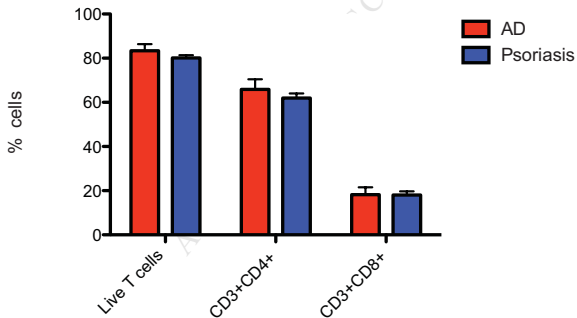

Supplement: NIHMS122658-supplement-supplement_1.pdf [file NIHMS122658-supplement-supplement_1.pdf]
